# Supplementary material
Source: PubMed Central journal article supplement (PMC3302589)
Supplement: supp_78.7.2297_AEM-AEM07050-11-s01.pdf [file supp_78.7.2297_AEM-AEM07050-11-s01.pdf]

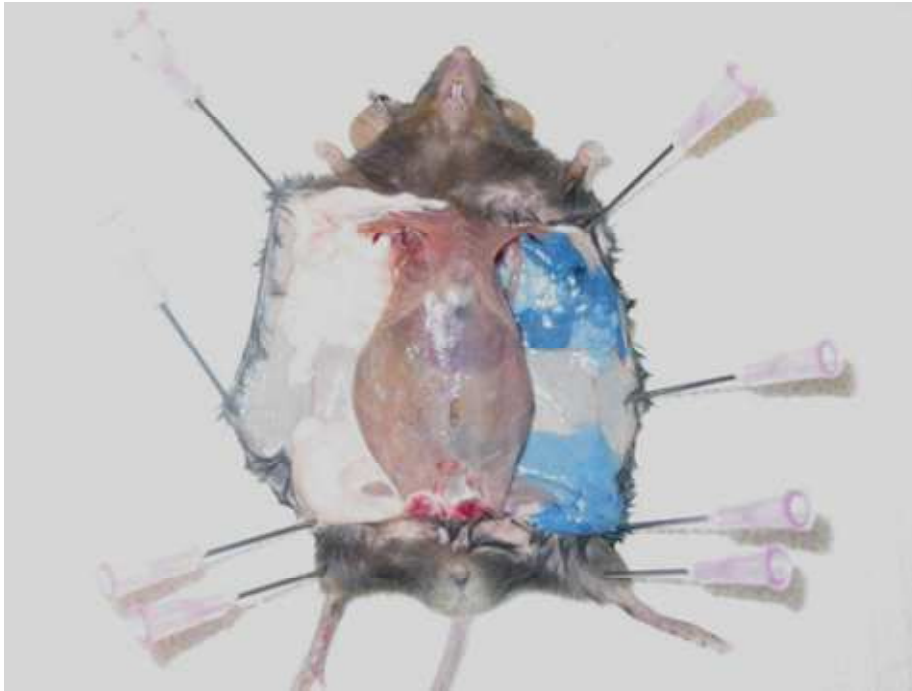

**Figure S1:**

Photograph of a female C57BL6/SJL mouse prepared for dissection of mammary glands.

Glands L3 and L4 appear blue demonstrating successful infusion and complete penetration of the gland tissue with 0.4% Trypan Blue in PBS used as marker dye.

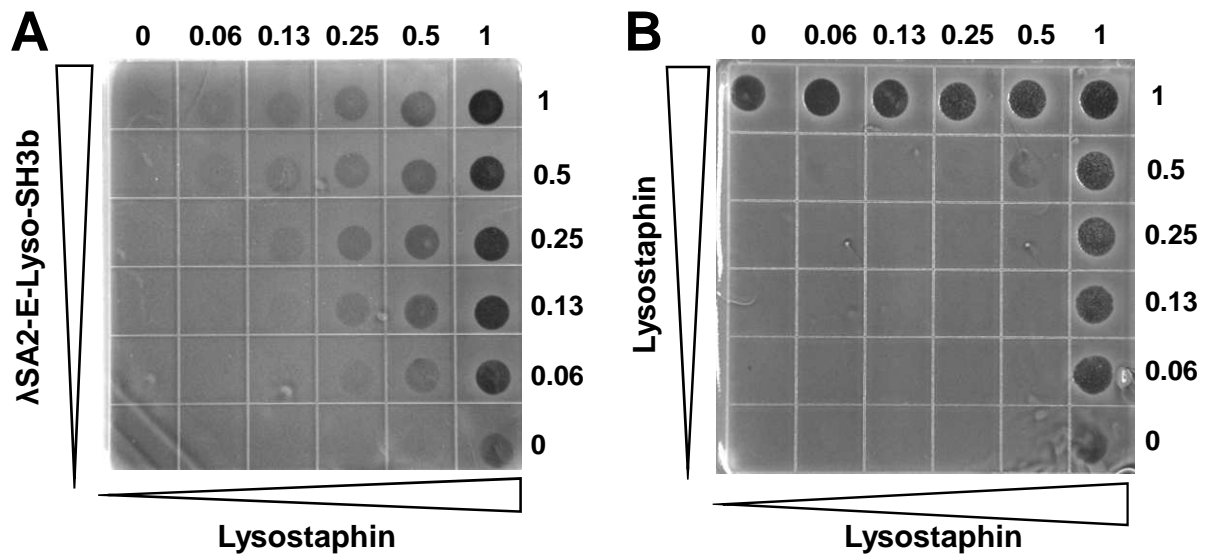

**Figure S2:**

Representative checkerboard plates showing synergy between  $\lambda$ SA2-E-Lyso-SH3b and Lysostaphin (**A**) and the additive effect observed when using Lysostaphin on both axes of the plate (**B**). 2-fold serial dilutions starting with the MIA of each protein were mixed in a 96-well plate in two dimensions and the mixed solutions spotted on a bacterial lawn of *S. aureus* Newbould 305 on a gridded agar plate. Lysis zones were observed after overnight incubation.
